# Supplementary material for: Generating Gene Ontology-Disease Inferences to Explore Mechanisms of Human Disease at the Comparative Toxicogenomics Database
Source: PLOS journal article supplement (doi:10.1371/journal.pone.0155530), 2016-05-12
Supplement: S5 (10.1371/journal.pone.0155530.s005) [file journal.pone.0155530.s005]

### Supplemental File S5: Distribution of inferred GO-BP terms for 2,457 disease-pairs

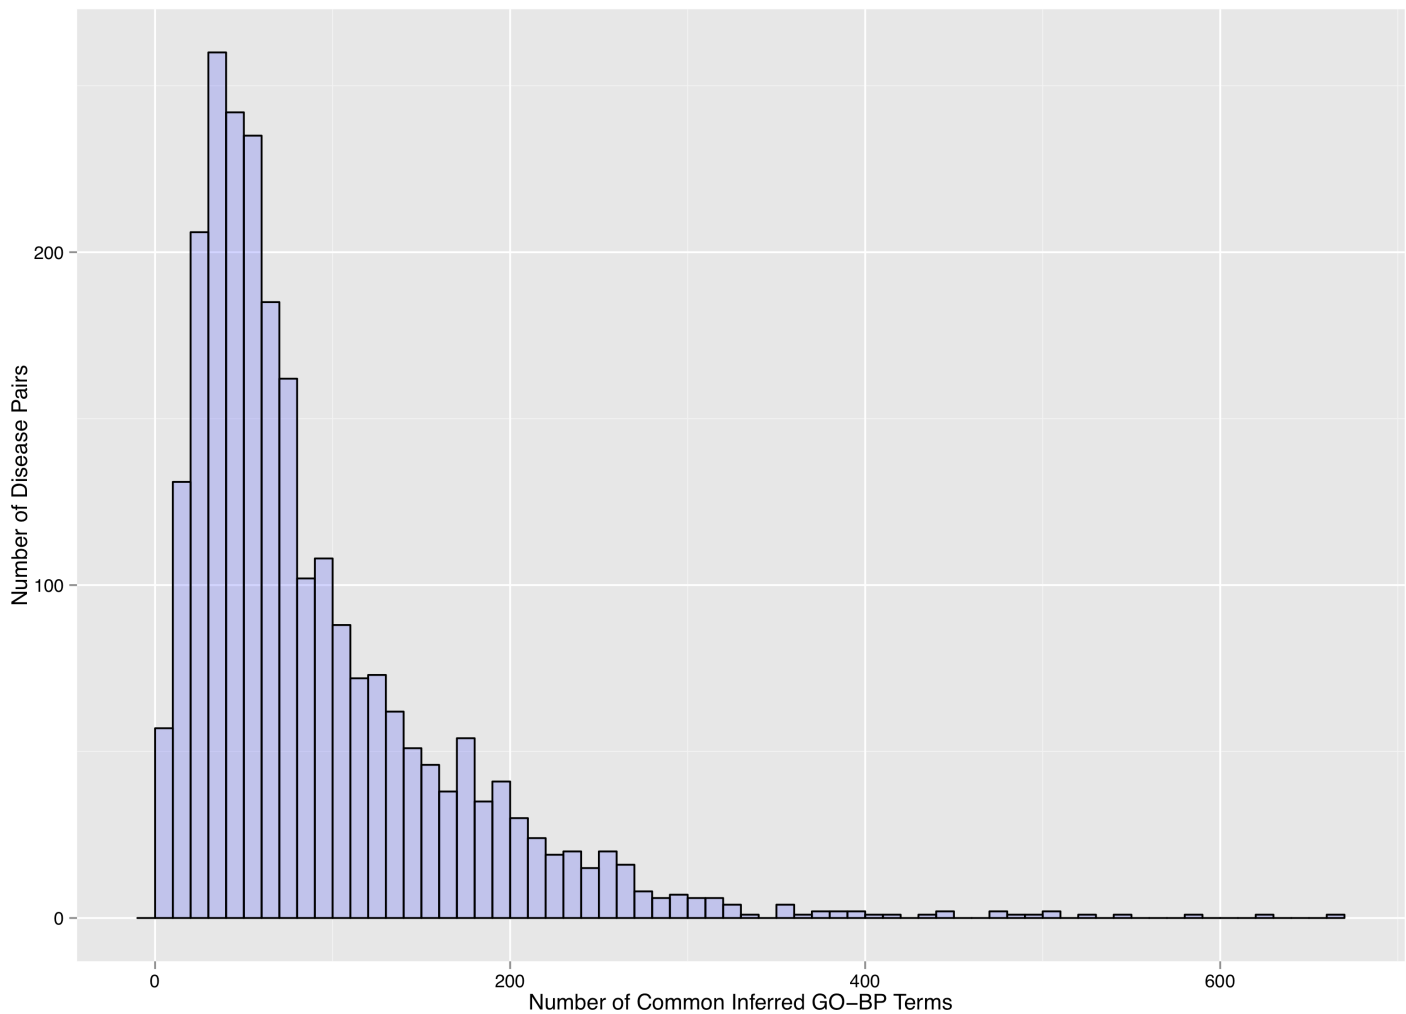

**Supplemental Figure 1:** The distribution of the number of shared inferred Gene Ontology Biological Process (GO-BP) terms for the 2,457 disease-pairs. The disease-pairs do not share any curated genes and the number of curated genes for each disease in the pair is within 10% of each other. For simplicity, values on the x-axis are bins of 10.

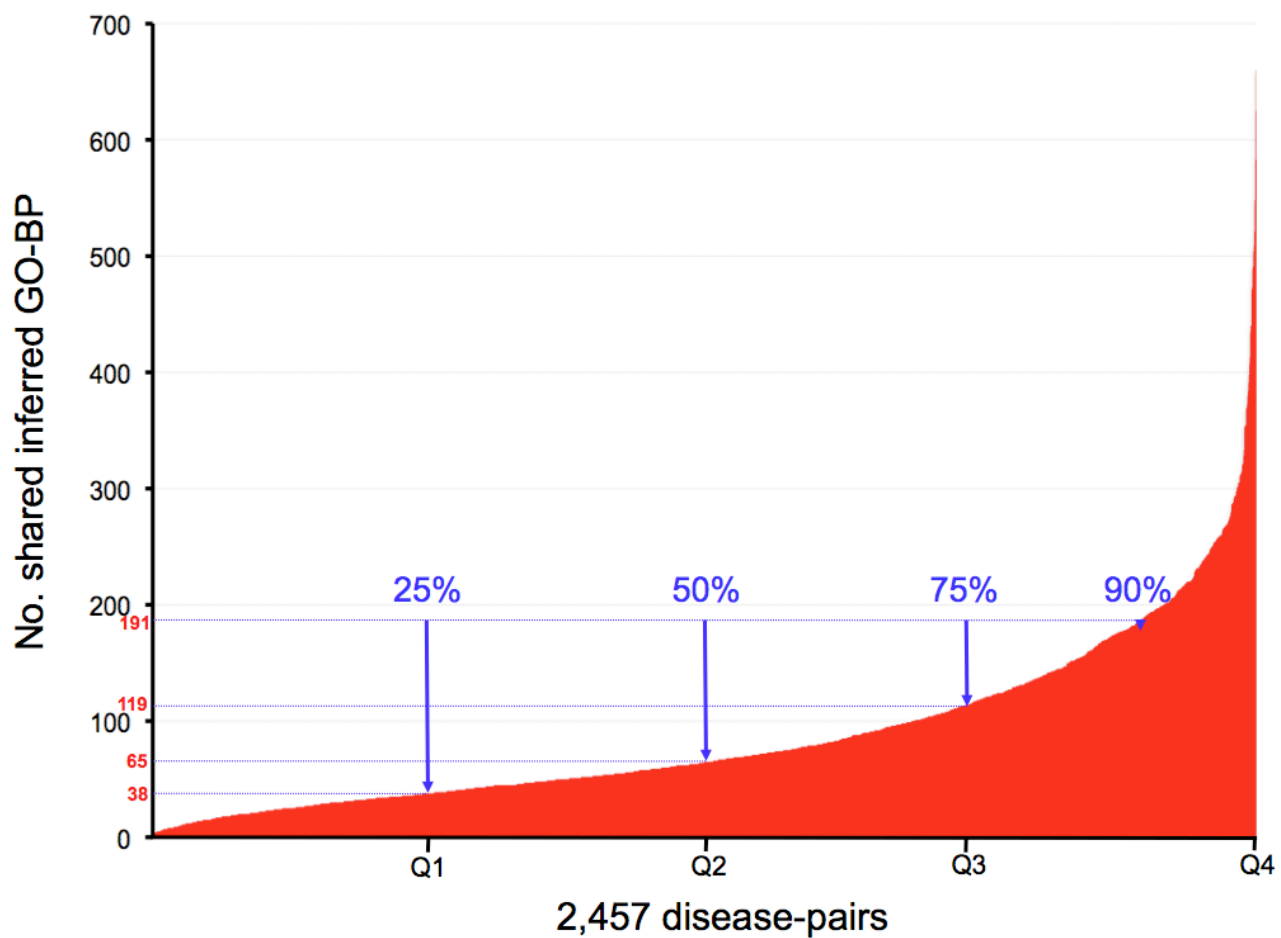

**Supplemental Figure 2:** The 2,457 disease-pairs binned into quartiles, each containing 614 disease-pairs. The first quartile (Q1) shows that 25% of all disease-pairs have 38 or fewer shared inferred GO-BP terms. The median (Q2) and third quartiles (Q3) are 65 and 119, respectively. Overall, 90% of the disease-pairs have 191 or fewer shared inferred GO-BP terms.
